# Supplementary material
Source: PubMed Central journal article supplement (PMC4458732)
Supplement: supp_M114.045856_mcp.M114.045856-1.pdf [file supp_M114.045856_mcp.M114.045856-1.pdf]

## Supplementary Data

| Calculated m/z for derivatized precursor M <sup>+</sup> | Compound# and sequences                                                                                                                                                                                                                                                                                                                                                                                                                                                                                                                                  |
|---------------------------------------------------------|----------------------------------------------------------------------------------------------------------------------------------------------------------------------------------------------------------------------------------------------------------------------------------------------------------------------------------------------------------------------------------------------------------------------------------------------------------------------------------------------------------------------------------------------------------|
| 1117.596                                                | <b>1a:</b> IdoA2S-GlcNAc-GlcA-GlcNAc-(CH <sub>2</sub> ) <sub>5</sub> NH <sub>2</sub><br><b>1b:</b> IdoA-GlcNAc6S-GlcA-GlcNAc-(CH <sub>2</sub> ) <sub>5</sub> NH <sub>2</sub><br><b>1c:</b> GlcA-GlcNAc-IdoA2S-GlcNAc-(CH <sub>2</sub> ) <sub>5</sub> NH <sub>2</sub><br><b>1d:</b> GlcA-GlcNAc-IdoA-GlcNAc6S-(CH <sub>2</sub> ) <sub>5</sub> NH <sub>2</sub><br><b>1e:</b> GlcA-GlcNAc-GlcA2S-GlcNAc-(CH <sub>2</sub> ) <sub>5</sub> NH <sub>2</sub>                                                                                                     |
| 1123.633                                                | <b>2a:</b> IdoA2S-GlcNS-GlcA-GlcNS-(CH <sub>2</sub> ) <sub>5</sub> NH <sub>2</sub><br><b>2b:</b> IdoA-GlcNS6S-GlcA-GlcNS-(CH <sub>2</sub> ) <sub>5</sub> NH <sub>2</sub><br><b>2c:</b> GlcA-GlcNS-IdoA2S-GlcNS-(CH <sub>2</sub> ) <sub>5</sub> NH <sub>2</sub><br><b>2d:</b> GlcA-GlcNS-IdoA-GlcNS6S-(CH <sub>2</sub> ) <sub>5</sub> NH <sub>2</sub><br><b>2e:</b> GlcA-GlcNS-GlcA2S-GlcNS-(CH <sub>2</sub> ) <sub>5</sub> NH <sub>2</sub>                                                                                                               |
| 1148.609                                                | <b>3a:</b> IdoA2S-GlcNAc6S-GlcA-GlcNAc-(CH <sub>2</sub> ) <sub>5</sub> NH <sub>2</sub><br><b>3b:</b> IdoA-GlcNAc6S-GlcA-GlcNAc6S-(CH <sub>2</sub> ) <sub>5</sub> NH <sub>2</sub><br><b>3c:</b> GlcA-GlcNAc-IdoA2S-GlcNAc6S-(CH <sub>2</sub> ) <sub>5</sub> NH <sub>2</sub><br><b>3d:</b> GlcA-GlcNAc6S-IdoA-GlcNAc6S-(CH <sub>2</sub> ) <sub>5</sub> NH <sub>2</sub><br><b>3e:</b> GlcA-GlcNAc-GlcA2S-GlcNAc6S-(CH <sub>2</sub> ) <sub>5</sub> NH <sub>2</sub><br><b>3f:</b> GlcA-GlcNAc6S-GlcA-GlcNAc6S-(CH <sub>2</sub> ) <sub>5</sub> NH <sub>2</sub> |
| 1154.648                                                | <b>4a:</b> IdoA2S-GlcNS6S-GlcA-GlcNS-(CH <sub>2</sub> ) <sub>5</sub> NH <sub>2</sub><br><b>4b:</b> IdoA-GlcNS6S-GlcA-GlcNS6S-(CH <sub>2</sub> ) <sub>5</sub> NH <sub>2</sub><br><b>4c:</b> GlcA-GlcNS-IdoA2S-GlcNS6S-(CH <sub>2</sub> ) <sub>5</sub> NH <sub>2</sub><br><b>4d:</b> GlcA-GlcNS-GlcA2S-GlcNS6S-(CH <sub>2</sub> ) <sub>5</sub> NH <sub>2</sub><br><b>4e:</b> GlcA-GlcNS6S-GlcA-GlcNS6S-(CH <sub>2</sub> ) <sub>5</sub> NH <sub>2</sub>                                                                                                     |

**Table S1. Sequences for four sets of synthetic tetrasaccharides with alkyl linker at the reducing end.** GlcNAc, N-acetylated glucosamine; GlcNS, N-sulfated glucosamine; GlcA, glucuronic acid; IdoA, iduronic acid; 2S, 2-O-sulfate; 6S, 6-O-sulfate.

| Type      | Symbol | Description                         | Derivatized m/z |
|-----------|--------|-------------------------------------|-----------------|
| HexA      | Ns1    | NonReducing End HexA                | 249.09743       |
| HexA2S    | Ns2    | NonReducing End HexA2S              | 280.111176      |
| dHexA     | Nu1    | NonReducing End Un-saturated HexA   | 217.071215      |
| dHexA2S   | Nu2    | NonReducing End Un-saturated HexA2S | 248.084961      |
| HexA      | A1     | Internal monosaccharide             | 218.07904       |
| HexA2S    | A2     | Internal monosaccharide             | 249.092786      |
| GlcNH     | B1     | Internal monosaccharide             | 232.154335      |
| GlcNH6S   | B2     | Internal monosaccharide             | 263.168081      |
| GlcNAc    | B3     | Internal monosaccharide             | 245.126324      |
| GlcNAc6S  | B4     | Internal monosaccharide             | 276.14007       |
| GlcNS     | B5     | Internal monosaccharide             | 248.145155      |
| GlcNS6S   | B6     | Internal monosaccharide             | 279.158901      |
| GlcNS3S   | B7     | Internal monosaccharide             | 265.143251      |
| GlcNS3S6S | B8     | Internal monosaccharide             | 296.156997      |
| GlcNH     | R1     | Reducing End NonReduced             | 247.17781       |
| GlcNH6S   | R2     | Reducing End NonReduced             | 278.191556      |
| GlcNAc    | R3     | Reducing End NonReduced             | 260.149799      |
| GlcNAc6S  | R4     | Reducing End NonReduced             | 291.163545      |
| GlcNS     | R5     | Reducing End NonReduced             | 263.16863       |
| GlcNS6S   | R6     | Reducing End NonReduced             | 294.182376      |
| GlcNS3S   | R7     | Reducing End NonReduced             | 280.166726      |
| GlcNS3S6S | R8     | Reducing End NonReduced             | 311.180472      |

**Table S2. The theoretical HS GAG sequence composition.** Accurate mass is calculated for each monosaccharide unit after chemical derivatization. For even-numbered oligosaccharides, the uronic acid residue at the non-reducing end can be one of Ns1, Ns2, Nu1 or Nu2, where Ns1 and Ns2 indicates saturated uronic acids, and Nu1 and Nu2 indicate unsaturated uronic acids as would result from lyase cleavage (see Supplementary Figure S2). The A1-A2 group and the B1-B8 group represent for internal uronic acid residues and glucosamine residues respectively, while the R1-R8 group represents the glucosamine residue at the reducing end. Reduction of the reducing end and reducing end tags can also be input by the user, and will modify the mass of the glucosamine residue at the reducing end.

| Structure                                                      | Observed<br>Precursor m/z | Theoretical<br>Precursor m/z | m/z<br>Difference | Retention<br>Time(min) | Charge | Score  | S-Δ Dev.(%) |
|----------------------------------------------------------------|---------------------------|------------------------------|-------------------|------------------------|--------|--------|-------------|
| d-HexA2S-GlcNS-HexA-GlcN-HexA-GlcNS3S6S-HexA-GlcN6S-HexA-AnMan | 1175.0000                 | 1174.5692                    | -0.4308           | 45.01                  | 2      | 5.9850 | 0           |
| HexA-GlcNS-HexA-GlcN-HexA2S-GlcNS3S-HexA2S-GlcN-HexA-AnMan     | 1175.0000                 | 1175.0754                    | 0.0754            | 45.01                  | 2      | 5.3050 | 0           |
| HexA-GlcNS-HexA-GlcNS-HexA-GlcNS-HexA-GlcNS-HexA-AnMan         | 1175.0000                 | 1174.5427                    | -0.4573           | 45.01                  | 2      | 2.3760 | 100         |

Table S3. GAG-ID results for [NS-decamer+2Na], theoretical derivatized  $m/z$  1174.5427<sup>2+</sup>

| Structure                                                                 | Observed<br>Precursor m/z | Theoretical<br>Precursor m/z | m/z<br>Difference | Retention<br>Time(min) | Charge | Score   | S-Δ Dev.(%) |
|---------------------------------------------------------------------------|---------------------------|------------------------------|-------------------|------------------------|--------|---------|-------------|
| HexA-GlcN-HexA-GlcNS3S-HexA2S-GlcN-HexA2S-GlcNS-HexA-GlcNS-HexA-AnMan     | 1408.0000                 | 1408.1875                    | 0.1875            | 48.94                  | 2      | 13.4316 | 2           |
| d-HexA-GlcN-HexA-GlcNS3S6S-HexA2S-GlcN-HexA2S-GlcNS-HexA-GlcNS-HexA-AnMan | 1408.0000                 | 1407.6813                    | -0.3187           | 48.94                  | 2      | 12.6687 | 0           |
| HexA-GlcN-HexA-GlcNAc-HexA-GlcNS3S-HexA-GlcNAc-HexA2S-GlcNAc-HexA-AnMan   | 1408.0000                 | 1407.6424                    | -0.3576           | 48.94                  | 2      | 11.7845 | 0           |
| HexA-GlcNS-HexA-GlcNS-HexA-GlcNS-HexA-GlcNS-HexA-GlcNS-HexA-AnMan         | 1408.0000                 | 1407.6548                    | -0.3452           | 48.94                  | 2      | 10.8344 | 100         |

Table S4. GAG-ID results for [NS-dodecamer+2Na], theoretical derivatized  $m/z$  1407.6548<sup>2+</sup>

| Structure                                                          | Observed<br>Precursor m/z | Theoretical<br>Precursor m/z | m/z<br>Difference | Retention<br>Time(min) | Charge | Score  | S-Δ Dev.(%) |
|--------------------------------------------------------------------|---------------------------|------------------------------|-------------------|------------------------|--------|--------|-------------|
| GlcNS-HexA-GlcNS-HexA2S-GlcNS3S6S-HexA-GlcN-HexA-GlcN-HexA-AnMan   | 1299.0000                 | 1299.1480                    | 0.148             | 45.35                  | 2      | 8.2235 | 0           |
| GlcN-HexA-GlcNS3S-HexA-GlcNAc-HexA-GlcNAc6S-HexA-GlcNAc-HexA-AnMan | 1299.0000                 | 1298.6029                    | -0.3971           | 45.36                  | 2      | 6.3858 | 0           |
| GlcNS-HexA-GlcNS-HexA-GlcNS-HexA-GlcNS-HexA-GlcNS-HexA-AnMan       | 1299.0000                 | 1298.6152                    | -0.3848           | 45.36                  | 2      | 6.1411 | 100         |

Table S5. GAG-ID results for [NS-undecamer+2Na], theoretical derivatized  $m/z$  1298.6152<sup>2+</sup>

| Structure                                         | Observed<br>Precursor m/z | Theoretical<br>Precursor m/z | m/z<br>Difference | Retention<br>Time(min) | Charge | Score  | S-Δ Dev.(%) |
|---------------------------------------------------|---------------------------|------------------------------|-------------------|------------------------|--------|--------|-------------|
| GlcNAc6S-HexA-GlcNS3S6S-HexA2S-GlcNS6S-HexA-AnMan | 901.5000                  | 901.4082                     | -0.0918           | 2.77                   | 2      | 1.7875 | 1           |
| GlcNAc6S-HexA-GlcNS3S6S-HexA2S-GlcNS6S-HexA-AnMan | 901.5000                  | 901.4082                     | -0.0918           | 2.78                   | 2      | 1.2915 | 4           |

| SEQUENCE                                          | UNMlon | NMlon | SIRatio | Score  |
|---------------------------------------------------|--------|-------|---------|--------|
| GlcNAc6S-HexA-GlcNS3S6S-HexA2S-GlcNS6S-HexA-AnMan | 14     | 14    | 0.144   | 1.2915 |
| GlcNAc-HexA2S-GlcNS3S6S-HexA2S-GlcNS6S-HexA-AnMan | 11     | 11    | 0.137   | 1.2285 |
| GlcNAc6S-HexA-GlcNS6S-HexA2S-GlcNS3S6S-HexA-AnMan | 14     | 14    | 0.132   | 1.1835 |
| GlcNS6S-HexA2S-GlcNS3S6S-HexA-GlcNAc6S-HexA-AnMan | 4      | 4     | 0.102   | 1.1198 |
| GlcNS6S-HexA2S-GlcNS3S6S-HexA2S-GlcNAc-HexA-AnMan | 4      | 4     | 0.102   | 1.1198 |
| GlcNS3S6S-HexA2S-GlcNAc-HexA2S-GlcNS6S-HexA-AnMan | 10     | 10    | 0.128   | 1.0256 |
| GlcNS3S6S-HexA-GlcNAc6S-HexA2S-GlcNS6S-HexA-AnMan | 9      | 9     | 0.126   | 1.008  |
| GlcNAc-HexA2S-GlcNS6S-HexA2S-GlcNS3S6S-HexA-AnMan | 11     | 11    | 0.125   | 0.996  |
| GlcNS3S-HexA2S-GlcNAc6S-HexA2S-GlcNS6S-HexA-AnMan | 8      | 8     | 0.124   | 0.9944 |
| GlcNS-HexA2S-GlcNAc6S-HexA2S-GlcNS3S6S-HexA-AnMan | 9      | 9     | 0.117   | 0.932  |
| GlcNAc6S-HexA2S-GlcNS3S6S-HexA-GlcNS6S-HexA-AnMan | 10     | 10    | 0.116   | 0.9288 |
| GlcNAc6S-HexA2S-GlcNS6S-HexA-GlcNS3S6S-HexA-AnMan | 10     | 10    | 0.115   | 0.9176 |
| GlcNAc6S-HexA2S-GlcNS6S-HexA2S-GlcNS3S-HexA-AnMan | 10     | 10    | 0.115   | 0.916  |
| GlcNAc6S-HexA2S-GlcNS3S-HexA2S-GlcNS6S-HexA-AnMan | 11     | 11    | 0.131   | 0.9135 |
| GlcNS-HexA2S-GlcNS3S6S-HexA2S-GlcNAc6S-HexA-AnMan | 8      | 8     | 0.113   | 0.9    |
| GlcNS6S-HexA2S-GlcNAc-HexA2S-GlcNS3S6S-HexA-AnMan | 7      | 7     | 0.11    | 0.8776 |
| GlcNS3S-HexA2S-GlcNS6S-HexA2S-GlcNAc6S-HexA-AnMan | 7      | 7     | 0.108   | 0.8664 |
| GlcNS3S6S-HexA2S-GlcNS6S-HexA2S-GlcNAc-HexA-AnMan | 7      | 7     | 0.108   | 0.8656 |
| GlcNS3S6S-HexA2S-GlcNS6S-HexA-GlcNAc6S-HexA-AnMan | 7      | 7     | 0.108   | 0.8656 |
| GlcNS6S-HexA-GlcNS3S6S-HexA2S-GlcNAc6S-HexA-AnMan | 7      | 7     | 0.108   | 0.8608 |
| GlcNS6S-HexA2S-GlcNAc6S-HexA-GlcNS3S6S-HexA-AnMan | 6      | 6     | 0.106   | 0.848  |
| GlcNS6S-HexA2S-GlcNS3S-HexA2S-GlcNAc6S-HexA-AnMan | 6      | 6     | 0.106   | 0.8464 |
| GlcNS6S-HexA2S-GlcNAc6S-HexA2S-GlcNS3S-HexA-AnMan | 6      | 6     | 0.106   | 0.8456 |
| GlcNAc6S-HexA2S-GlcNS-HexA2S-GlcNS3S6S-HexA-AnMan | 11     | 11    | 0.119   | 0.8295 |
| GlcNS3S6S-HexA2S-GlcNAc6S-HexA-GlcNS6S-HexA-AnMan | 9      | 9     | 0.114   | 0.7959 |
| GlcNAc6S-HexA2S-GlcNS3S6S-HexA2S-GlcNS-HexA-AnMan | 9      | 9     | 0.113   | 0.7917 |
| GlcNS3S6S-HexA2S-GlcNS-HexA2S-GlcNAc6S-HexA-AnMan | 9      | 9     | 0.112   | 0.7854 |
| GlcNS6S-HexA-GlcNAc6S-HexA2S-GlcNS3S6S-HexA-AnMan | 8      | 8     | 0.112   | 0.7812 |
| GlcNS3S6S-HexA2S-GlcNAc6S-HexA2S-GlcNS-HexA-AnMan | 8      | 8     | 0.111   | 0.7756 |
| GlcNS3S6S-HexA-GlcNS6S-HexA2S-GlcNAc6S-HexA-AnMan | 8      | 8     | 0.11    | 0.77   |

**Table S6. GAG-ID results for [Arixtra-like heptamer+2Na], theoretical derivatized  $m/z$  901.4082<sup>2+</sup>**

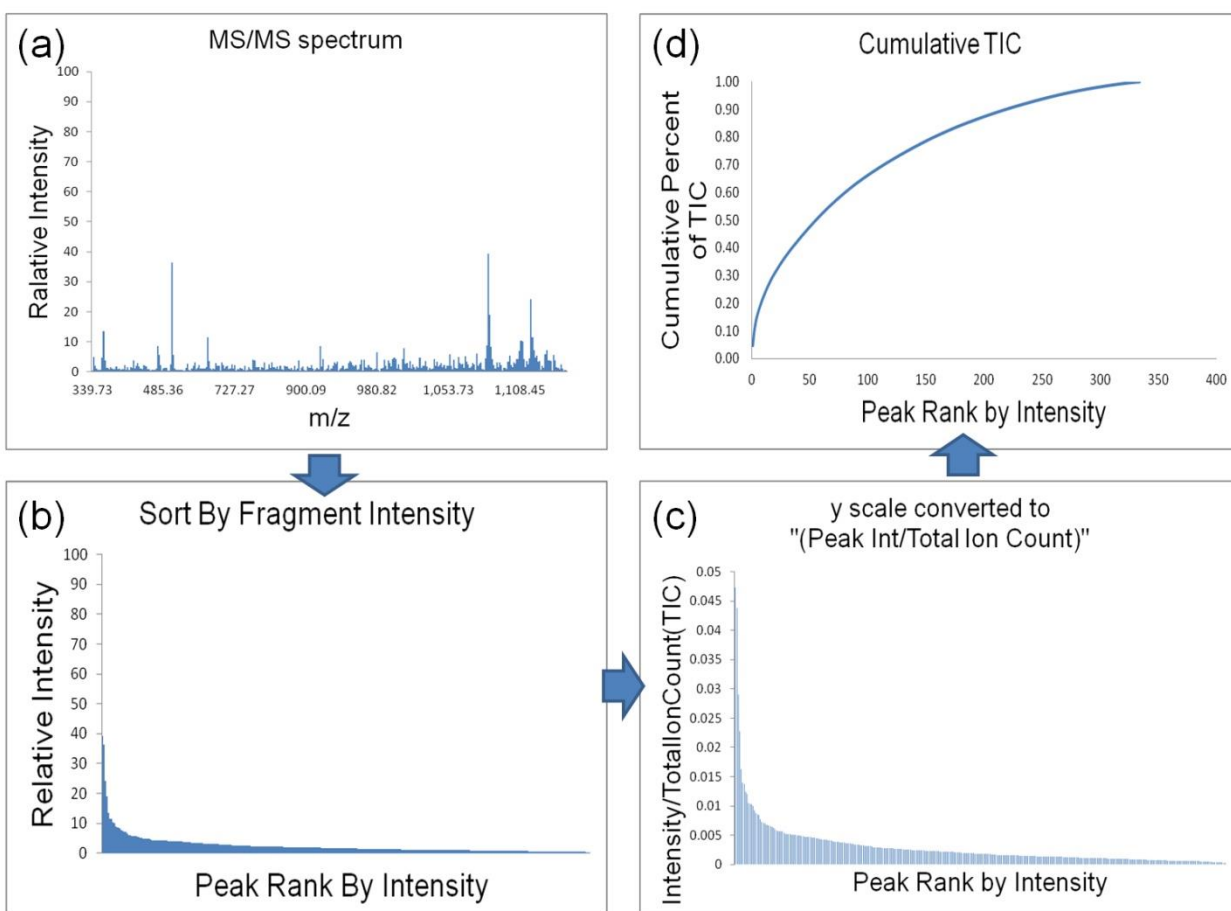

**Figure S1 MS/MS spectrum preprocessing.** (a) Taking an MS/MS spectrum as an example, all spectra acquired for scoring were preprocessed. (b) All peaks sorted by intensity in decreasing order were listed from the most intense to the least intense peak. (c) All peak intensities were divided by total ion count (TIC) to convert the y-axis to “peak intensity/TIC”. (d) The cumulative intensity from the most intense peak to all other peaks was computed (represented here by the curve).
